# Supplementary material for: Iron-related toxicity of single-walled carbon nanotubes and crocidolite fibres in human mesothelial cells investigated by Synchrotron XRF microscopy
Source: PubMed Central journal article supplement (PMC5768674; doi:10.1038/s41598-017-19076-1), 2018-01-15
Supplement: 41598_2017_19076_MOESM1_ESM.pdf [file 41598_2017_19076_MOESM1_ESM.pdf]

ORIGINAL

Short running header: Iron related toxicity of SWCNTs in MeT-5A cells by SR-XRF

Cammisuli F et al

**Iron-related toxicity of single-walled carbon  
nanotubes and crocidolite fibres in human  
mesothelial cells investigated by Synchrotron XRF  
microscopy**

Francesca Cammisuli<sup>1</sup>, Silvia Giordani<sup>2</sup>, Alessandra Gianoncelli<sup>3</sup>, Clara Rizzardi<sup>1</sup>, Lucia Radillo<sup>1</sup>, Marina Zweyer<sup>1</sup>, Tatiana Da Ros<sup>4</sup>, Murielle Salomé<sup>5</sup>, Mauro Melato<sup>6</sup>, Lorella Pascolo<sup>6</sup>

<sup>1</sup>Department of Medical, Surgical, and Health Sciences, University of Trieste, 34149 Trieste, Italy.

<sup>2</sup>Department of Chemistry, University of Turin, Turin, Italy.

<sup>3</sup>Elettra - Sincrotrone Trieste, Basovizza, 34149 Trieste, Italy.

<sup>4</sup>Department of Chemical and Pharmaceutical Sciences, University of Trieste, 34149 Trieste, Italy.

<sup>5</sup>European Synchrotron Radiation Facility, 38000 Grenoble, Cedex 9, France

<sup>6</sup>Institute for Maternal and Child Health, IRCCS Burlo Garofolo, 34137 Trieste, Italy

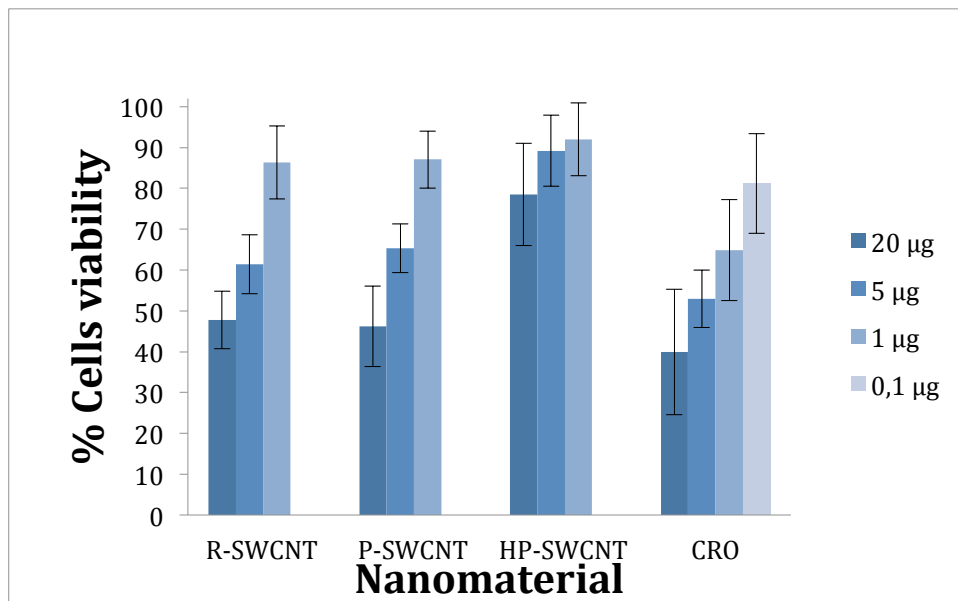

**Figure S1. Viability test of cells after treatments.** The panel shows the toxic effects of nanomaterials on vitality of MeT-5A cells. The cells are grown for 24h and then treated with nanomaterials at 20, 5 and 1  $\mu\text{g}/\text{mL}$  (and 0.1 for crocidolite) for 24h. Relative cell viability was assessed by trypan blue dye exclusion method. Results are presented as percentage of living cells.
